# Supplementary material for: Selection and Characterization of a Candidate Therapeutic Bacteriophage That Lyses the Escherichia coli O104:H4 Strain from the 2011 Outbreak in Germany
Source: PLoS One. 2012 Dec 21;7(12):e52709. doi: 10.1371/journal.pone.0052709 (PMC3528706; doi:10.1371/journal.pone.0052709)
Supplement: Table S1 — Comparison of ORFs/genes of phage GEC-3S with other representatives of the RB49 group. (XLSX) [file pone.0052709.s001.xlsx]

## Sheet: Sheet1
Table S1. Comparison of ORFs/genes of phage 3S with other representatives of the RB49 group.
ORF, cds N				Predicted function/Homologs/Paralogs	AA length	According to Arbiol et al. [28]
3S	phi1	RB49	JSE
004	004	004	-	Hypothetical protein	64
-	-	-	005	Putative homing endonuclease RB16 2, hypothetical protein RB49p040, paralog to EpJSE_00105	187
-	006.1	006.1	-	Hypothetical protein	36
010	009.1	-	-	Hypothetical protein phi1p009.1, hypothetical protein JSE ORF010; paralog of phi1 ORF010	58	Coliphage JSE ORF010; paralog of phi1 ORF010
-	-	-	015	Homing endonuclease, putative homing endonuclease (Shigella phage phiSboM-AG3)	306
-	-	-	028	Split gene of DNA polymerase, 3S orf028, phi1p026, RB49p026	402
-	-	040	-	Coliphage RB16 HNH endonuclease, cd00018	184	Coliphage RB16 HNH endonuclease, cd00018
-	-	-	0058	Homing endonuclease	173
-	-	-	0059	NrdG anaerobic NTP reductase small subunit	292
063	-	-	-	Putative homing endonuclease RB16 6 (Enterobacteria phage RB16)	251
075	074	074	-	Hypothetical protein	65
-	084.1	-	-	ORFan	42	ORFan
-	-	-	101	Putative endodeoxyribonuclease [Escherichia coli 541-15] EIL51431.1	176
-	-	-	105	Homing endonuclease, RB49p040	191
112	111	11	-	Hypothetical protein	65
-	130.1	-	134	Hypothetical protein in RB49similiar to p240, 3S orf241	343, 380	Coliphage RB49 ORF240 (diverged paralog of ORF240 in both phages)
137	-	-	-	Homing endonuclease, putative H-N-H-endonuclease P-TflX (Enterobacteria phage T5)	246
-	-	141	-	Coliphage phi1 ORF140 C-term (phi1 ORF140 5 RB49 ORFs140þ141)	32	Coliphage phi1 ORF140 C-term (phi1 ORF140 5 RB49 ORFs140þ141)
-	149.1	-	-	segC	194	T4 SegC endonuclease, pfam01541
-	-	-	154	putative Seg-like homing endonuclease, GIY-YIG family [Enterobacteria phage RB16] ref|YP_003858515.1|	251
163	-	-	-	ORFan	32
164	161.1	-	166	hypothetical protein	45,45,52	Coliphage JSE ORF166
171	-	-	-	ORFan	44
173	168.1	-	174	hypothetical protein	54.29	Coliphage JSE ORF174
-	-	168.2	-	Paralog/overlapping frame with Hoc in phi1 and RB49 phages	65
-	-	-	184	Split gene of baseplate hub subunit 244+133	133
195	189.1	189.1	-	Hypothetical protein	81
-	-	192	-	Weak hit to Plasmodium ORF	158
-	-	-	199	ORFan	103
-	-	195	-	ORFan	84	ORFan
-	-	196	-	ORFan	63	ORFan
-	-	196.1	-	ORFan	25	ORFan
-	-	-	203	Split gene of hypothetical protein 22+80, 3S orf201, phi1p197, RB49p197	80
205	202	202	-	Hypothetical protein	69,69,87
-	-	-	212	Split gene of hypothetical protein 85+26, 3Sorf210, phi1p206, RB49p206	26
-	-	-	215	hypothetical protein ECE128010_0032 [Escherichia coli E128010] EFZ49617.1	88
-	-	211	218	Vibrio fischeri superintegron ORF1	114	Vibrio fischeri superintegron ORF1
228	226	226	-	Hypothetical protein	49
-	-	-	237	Putative homing endonuclease (Enterobacteria phage RB15) ABA03242.1	215
233	231	231	-		55
234	232	232	-	Hypothetical protein	57
-	-	237	-		30
241	240	240	-	Hypothetical protein	392, 460, 485
-	-	254	-	Paralog to RB49orf252	65
-	263	263	266	Hypothetical protein	51	Hypothetical protein RB49p263 hypothetical protein EpJSE_00266 Hypothetical protein phi1p263
-	263.1	-	-	ORFan	86	ORFan
265	-	-	-	ORFan	80
266	-	-	-	ORFan	66
276orf	276orf	279orf	277orf
163424 bp	164270 bp	164028 bp	166418 bp
